# Supplementary material for: Structure transformation in Ca1−x−δSrδLaxAg1−ySb (0 ≤ δ ≤ 0.7) and related thermoelectric properties
Source: Royal Society of Chemistry journal article supplement (doi:10.1039/c8qi00293b), 2018-01-01
Supplement: c8qi00293b1.pdf [file c8qi00293b1.pdf]

## Structure Transformation in $\text{Ca}_{1-x-\delta}\text{Sr}_\delta\text{La}_x\text{Ag}_{1-y}\text{Sb}$ ( $0 \leq \delta \leq 0.7$ ) and Related Thermoelectric Properties

Jia Guo, Min Zhu, Xin Li, Xu-Tang Tao, and Sheng-Qing Xia\*

State Key Laboratory of Crystal Materials, Institute of Crystal Materials, Shandong University, Jinan, Shandong 250100, People's Republic of China

### Supporting Information

#### Contents

1. EDS analyses on the compositions of single crystal of  $\text{Ca}_{0.16(2)}\text{Sr}_{0.77(3)}\text{La}_{0.07(1)}\text{Ag}_{0.931(3)}\text{Sb}$ .
2. **Table S1.** Selected crystal data and structure refinement parameters for  $\text{Ca}_{0.16(2)}\text{Sr}_{0.77(3)}\text{La}_{0.07(1)}\text{Ag}_{0.931(3)}\text{Sb}$ .
3. **Table S2.** Refined atomic coordinates and isotropic displacement parameters for  $\text{Ca}_{0.16(2)}\text{Sr}_{0.77(3)}\text{La}_{0.07(1)}\text{Ag}_{0.931(3)}\text{Sb}$ .
4. **Table S3.** Important interatomic distances (Å) in  $\text{Ca}_{0.16(2)}\text{Sr}_{0.77(3)}\text{La}_{0.07(1)}\text{Ag}_{0.931(3)}\text{Sb}$ .
5. **Table S4.** Unit cell parameters refined from the powder diffraction patterns of  $\text{Ca}_{1-x-\delta}\text{Sr}_\delta\text{La}_x\text{Ag}_{0.89}\text{Sb}$  with various compositions.
6. **Figure S1.** Powder X-ray diffraction patterns for  $\text{Ca}_{0.85}\text{La}_{0.15}\text{Ag}_{1-y}\text{Sb}$  ( $y = 0.11, 0.13, 0.15$ ) materials.
7. **Figure S2.** Components of the electronic (a) and lattice thermal conductivity (b) for materials  $\text{Ca}_{0.85}\text{La}_{0.15}\text{Ag}_{1-y}\text{Sb}$  ( $y = 0.11, 0.13, 0.15$ ).
8. **Figure S3.** Powder X-ray diffraction patterns of material  $\text{Ca}_{0.85}\text{La}_{0.15}\text{Ag}_{0.90}\text{Sb}$ . The theoretical predictions of  $\text{Ca}_{0.85}\text{La}_{0.15}\text{Ag}_{0.85}\text{Sb}$  and Ag were provided for comparison as well.
9. **Figure S4.** [AgSb] anionic framework structure of  $\text{Ca}_{0.16(2)}\text{Sr}_{0.77(3)}\text{La}_{0.07(1)}\text{Ag}_{0.931(3)}\text{Sb}$  viewed along the  $b$ -axis. The long interlayered Ag-Sb distances (4.15 and 4.24 Å) as well as the almost planar [AgSb] net (in-plane Ag-Sb-Ag angle: 119.9°) both suggest high similarity to the SrAgSb structure, which evidently suggest the structure transformation of  $\text{Ca}_{1-x-\delta}\text{Sr}_\delta\text{La}_x\text{Ag}_{1-y}\text{Sb}$  from the LiGaGe type towards the ZrBeSi type.
10. **Figure S5.** Temperature dependence of the heat capacity of materials  $\text{Ca}_{1-\delta}\text{Sr}_\delta\text{La}_{0.15}\text{Ag}_{0.89}\text{Sb}$  ( $\delta = 0.1, 0.2, 0.3, 0.4, 0.5, 0.6, 0.7$ ).
11. **Figure S6.** Band gaps (a) evaluated by the peaks of Seebeck coefficient measurements and corresponding effective mass (b) with various Sr contents.
12. **Figure S7.** Electronic band structures calculated for hypothetical LiGaGe-type  $\text{Ca}_{1-x}\text{La}_x\text{Ag}_y\text{Sb}$  (left) and ZrBeSi-type SrAgSb (right).
13. **Figure S8.** Partial density of states (DOS) for ZrBeSi-type SrAgSb.

EDS analyses on the compositions of single crystal of  $\text{Ca}_{0.16(1)}\text{Sr}_{0.76(1)}\text{La}_{0.07}\text{Ag}_{0.931(3)}\text{Sb}$ .

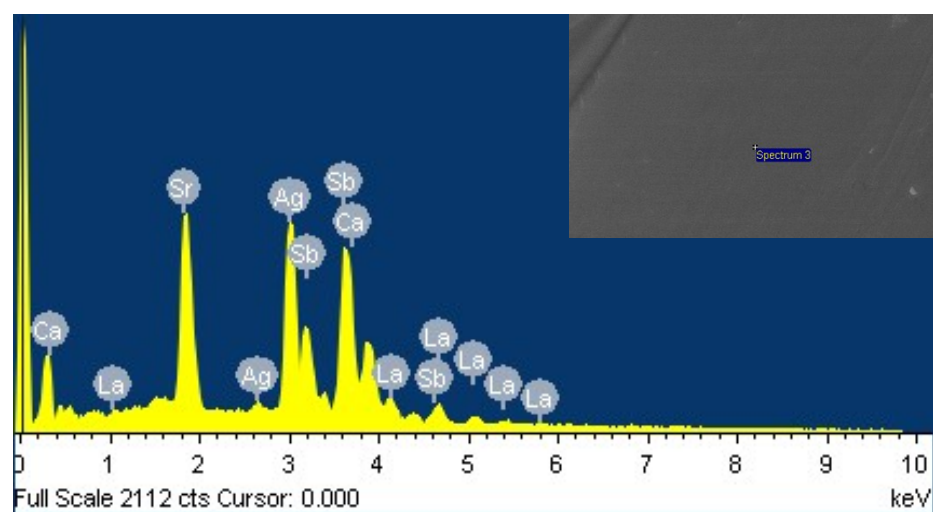

| Element | Weight% | Atomic% | Composition |
|---------|---------|---------|-------------|
| Ca      | 2.62    | 6.86    | 0.20        |
| Sr      | 19.45   | 23.25   | 0.67        |
| Ag      | 31.39   | 30.48   | 0.13        |
| Sb      | 40.58   | 34.92   | 0.87        |
| La      | 5.95    | 4.49    | 1           |

**Table S1.** Selected crystal data and structure refinement parameters for  $\text{Ca}_{0.16(2)}\text{Sr}_{0.77(3)}\text{La}_{0.07(1)}\text{Ag}_{0.931(3)}\text{Sb}$ .

| Formula                                                | $\text{Ca}_{0.16(2)}\text{Sr}_{0.77(3)}\text{La}_{0.07(1)}\text{Ag}_{0.931(3)}\text{Sb}$ |
|--------------------------------------------------------|------------------------------------------------------------------------------------------|
| fw/ $\text{g}\cdot\text{mol}^{-1}$                     | 305.67                                                                                   |
| T / K                                                  | 273(2)                                                                                   |
| Radiation, wavelength                                  | Mo-K $\alpha$ , 0.71073 Å                                                                |
| Space group, No.                                       | P6(3)mc (No.186)                                                                         |
| Z                                                      | 2                                                                                        |
| Cell dimensions                                        |                                                                                          |
| $a$ / Å                                                | 4.7512(4)                                                                                |
| $c$ / Å                                                | 8.3913(15)                                                                               |
| $V$ / Å <sup>3</sup>                                   | 164.05(4)                                                                                |
| $\rho_{\text{calc}} / \text{g}\cdot\text{cm}^{-3}$     | 6.188                                                                                    |
| $\mu_{\text{Mo K}\alpha} / \text{cm}^{-1}$             | 2.693                                                                                    |
| Final $R$ indices <sup>a</sup><br>[ $I > 2\sigma(I)$ ] | $R1 = 0.0132$<br>$wR2 = 0.0291$                                                          |
| Final $R$ indices <sup>a</sup><br>[all data]           | $R1 = 0.0143$<br>$wR2 = 0.0297$                                                          |

<sup>a</sup>  $R_1 = \sum ||F_o| - |F_c|| / \sum |F_o|$ ;  $wR_2 = [\sum [w(F_o^2 - F_c^2)^2] / \sum [w(F_o^2)^2]]^{1/2}$ , and  $w = 1/[\sigma^2 F_o^2 + (A \cdot P)^2 + B \cdot P]$ ,  $P = (F_o^2 + 2F_c^2)/3$ ; A and B are weight coefficients.

**Table S2.** Refined atomic coordinates and isotropic displacement parameters for  $\text{Ca}_{0.16(2)}\text{Sr}_{0.77(3)}\text{La}_{0.07(1)}\text{Ag}_{0.931(3)}\text{Sb}$ .

| Atoms | Wyckoff | occ.      | $x$ | $y$ | $z$       | $U_{\text{eq}}^a$ ( $\text{\AA}^2$ ) |
|-------|---------|-----------|-----|-----|-----------|--------------------------------------|
| Ag    | 2b      | 0.931(3)  | 1/3 | 2/3 | 0.2465(5) | 0.0230(5)                            |
| Sb    | 2b      | 1         | 1/3 | 2/3 | 0.7519(4) | 0.0134(3)                            |
| La    | 2a      | 0.068(13) | 0   | 0   | 0         | 0.0145(3)                            |
| Sr    | 2a      | 0.77(3)   | 0   | 0   | 0         | 0.0145(3)                            |
| Ca    | 2a      | 0.162(19) | 0   | 0   | 0         | 0.0145(3)                            |

<sup>a</sup>  $U_{\text{eq}}$  is defined as one third of the trace of the orthogonalized  $U^{\text{ij}}$  tensor.

**Table S3.** Important interatomic distances (Å) in  $\text{Ca}_{0.16(2)}\text{Sr}_{0.77(3)}\text{La}_{0.07(1)}\text{Ag}_{0.931(3)}\text{Sb}$ .

| Atom pairs |               | Distances (Å) |
|------------|---------------|---------------|
| Sr/La/Ca – | Sb $\times$ 6 | 3.434(2)      |
|            | Ag $\times$ 2 | 3.446(3)      |
|            | Ag $\times$ 3 | 3.461(3)      |
| Ag –       | Sb $\times$ 3 | 2.7435(3)     |

**Table S4.** Unit cell parameters refined from the powder diffraction patterns of  $\text{Ca}_{1-x}\text{Sr}_\delta\text{La}_x\text{Ag}_{0.89}\text{Sb}$  with various compositions.

| $\text{Ca}_{1-x}\text{Sr}_\delta\text{La}_x\text{Ag}_{0.89}\text{Sb}$ | <b>a</b>   | <b>b</b> | <b>c</b>   | <b><math>\alpha\beta\gamma</math></b>                       |
|-----------------------------------------------------------------------|------------|----------|------------|-------------------------------------------------------------|
| <b>x=0.15, <math>\delta=0</math></b>                                  | 4.703(1) Å | 4.703 Å  | 7.792(2) Å | $\alpha=90^\circ$<br>$\beta=90^\circ$<br>$\gamma=120^\circ$ |
| <b>x=0.15, <math>\delta=0.1</math></b>                                | 4.706(1) Å | 4.706 Å  | 7.853(1) Å |                                                             |
| <b>x=0.15, <math>\delta=0.2</math></b>                                | 4.708(1) Å | 4.708 Å  | 7.935(1) Å |                                                             |
| <b>x=0.15, <math>\delta=0.3</math></b>                                | 4.720(1) Å | 4.720 Å  | 7.985(3) Å |                                                             |
| <b>x=0.15, <math>\delta=0.4</math></b>                                | 4.730(2) Å | 4.730 Å  | 8.070(4) Å |                                                             |
| <b>x=0.15, <math>\delta=0.5</math></b>                                | 4.729(1) Å | 4.729 Å  | 8.136(3) Å |                                                             |
| <b>x=0.15, <math>\delta=0.6</math></b>                                | 4.742(1) Å | 4.742 Å  | 8.217(1) Å |                                                             |
| <b>x=0.15, <math>\delta=0.7</math></b>                                | 4.749(2) Å | 4.749 Å  | 8.299(7) Å |                                                             |
| <b>x=0, <math>\delta=0.85</math></b>                                  | 4.762(1) Å | 4.762 Å  | 8.532(1) Å |                                                             |

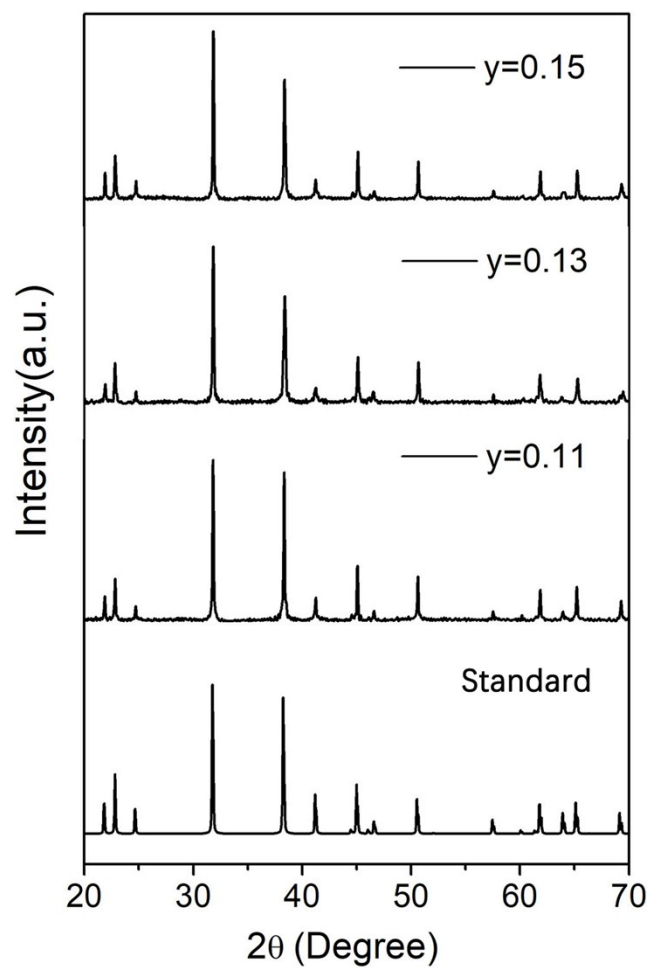

**Figure S1.** Powder X-ray diffraction patterns for  $\text{Ca}_{0.85}\text{La}_{0.15}\text{Ag}_{1-y}\text{Sb}$  ( $y = 0.11, 0.13, 0.15$ ) materials.

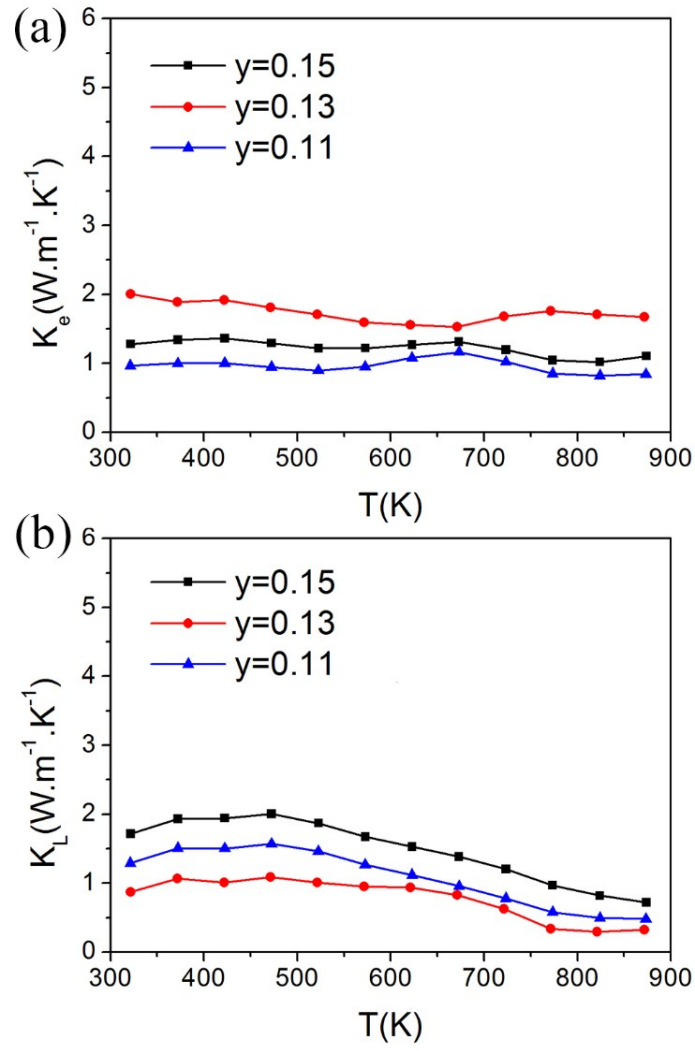

**Figure S2.** Components of the electronic (a) and lattice thermal conductivity (b) for materials  $\text{Ca}_{0.85}\text{La}_{0.15}\text{Ag}_{1-y}\text{Sb}$  ( $y = 0.11, 0.13, 0.15$ ).



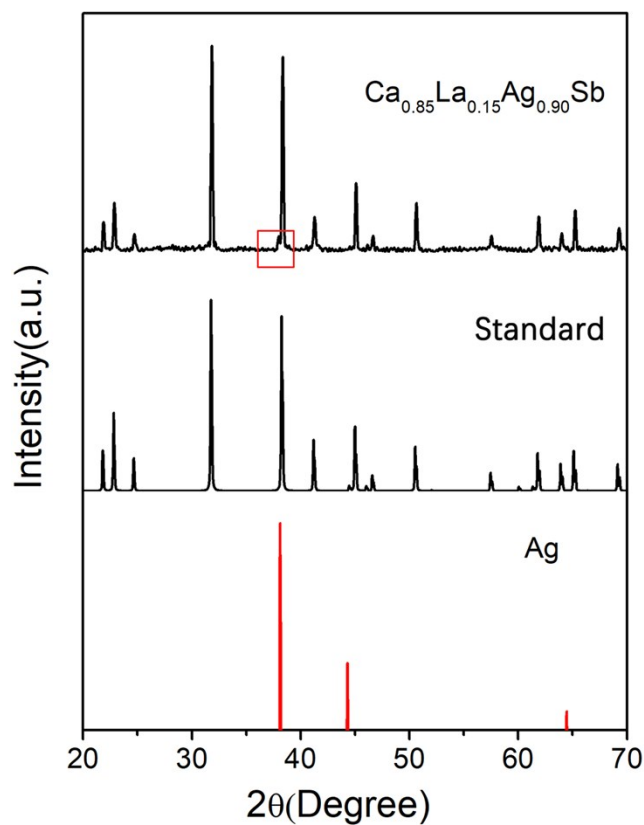

**Figure S3.** Powder X-ray diffraction patterns of material  $\text{Ca}_{0.85}\text{La}_{0.15}\text{Ag}_{0.90}\text{Sb}$ . The theoretical predictions of  $\text{Ca}_{0.85}\text{La}_{0.15}\text{Ag}_{0.85}\text{Sb}$  and Ag were provided for comparison as well.

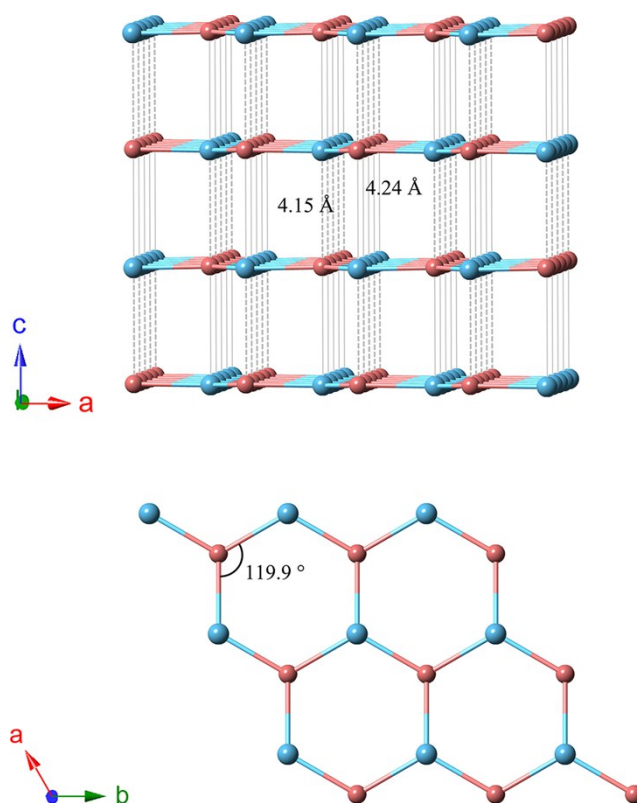

**Figure S4.** [AgSb] anionic framework structure of  $\text{Ca}_{0.16(2)}\text{Sr}_{0.77(3)}\text{La}_{0.07(1)}\text{Ag}_{0.931(3)}\text{Sb}$  viewed along the  $b$ -axis. The long interlayered Ag-Sb distances (4.15 and 4.24 Å) as well as the almost planar [AgSb] net (in-plane Ag-Sb-Ag angle:  $119.9^\circ$ ) both suggest high similarity to the SrAgSb structure, which evidently suggest the structure transformation of  $\text{Ca}_{1-x-\delta}\text{Sr}_\delta\text{La}_x\text{Ag}_{1-y}\text{Sb}$  from the LiGaGe type towards the ZrBeSi type.

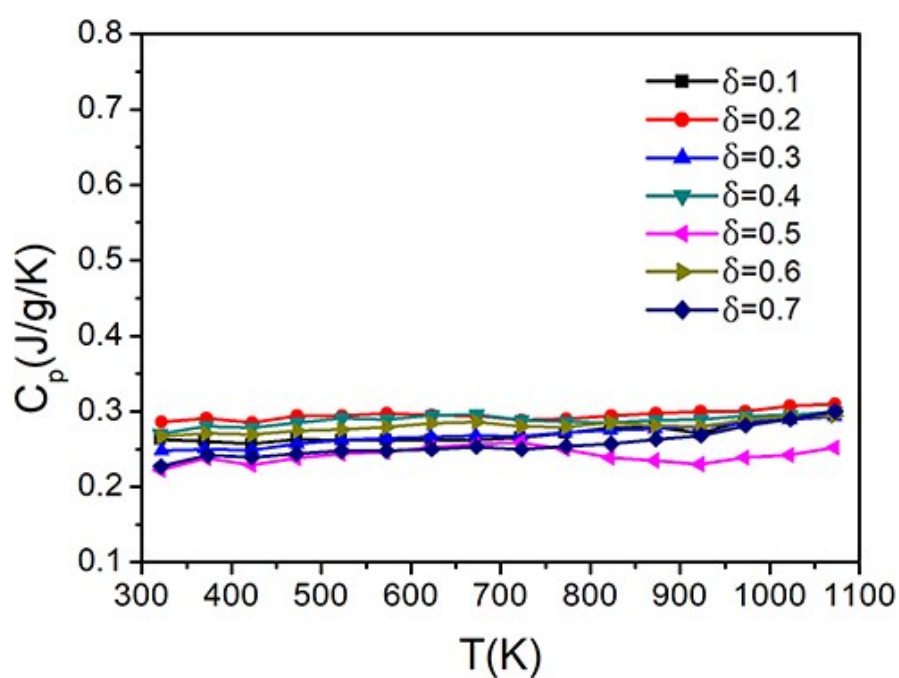

**Figure S5.** Temperature dependence of the heat capacity of materials  $\text{Ca}_{1-\delta}\text{Sr}_\delta\text{La}_{0.15}\text{Ag}_{0.89}\text{Sb}$  ( $\delta = 0.1, 0.2, 0.3, 0.4, 0.5, 0.6, 0.7$ ).

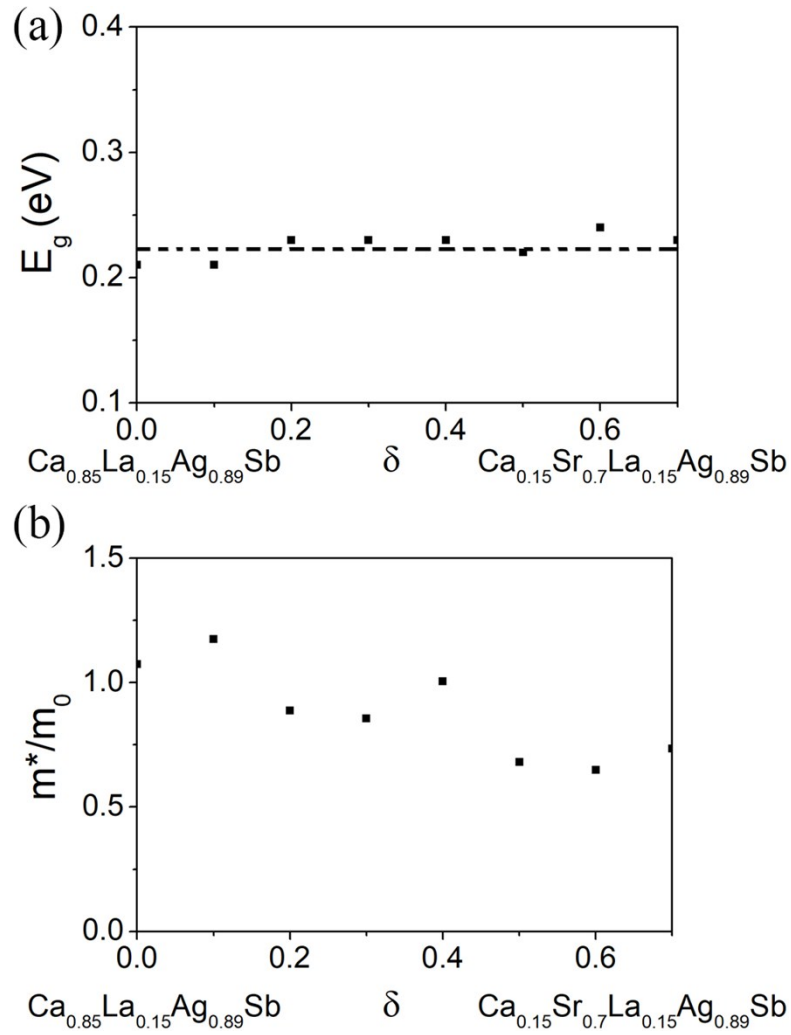

**Figure S6.** Band gaps (a) evaluated by the peaks of Seebeck coefficient measurements and corresponding effective mass (b) with various Sr contents in  $\text{Ca}_{0.85-\delta}\text{Sr}_{\delta}\text{La}_{0.15}\text{Ag}_{0.89}\text{Sb}$ .

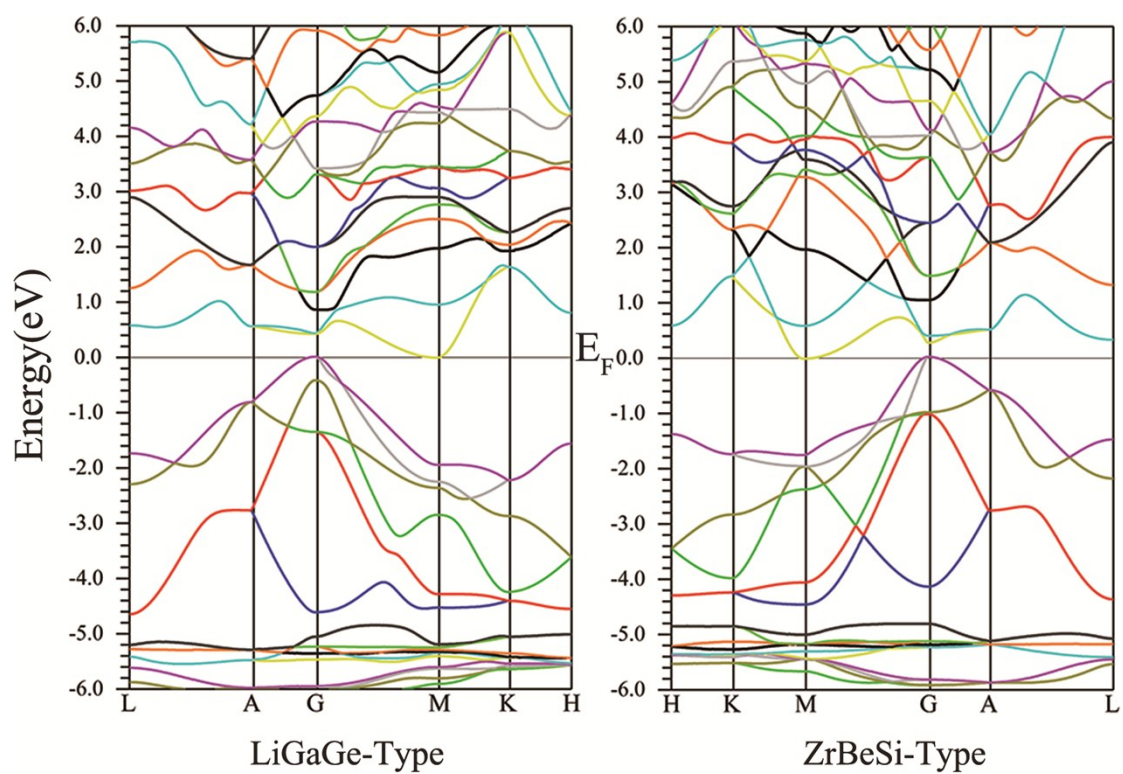

**Figure S7.** Electronic band structures calculated for hypothetical LiGaGe-type  $\text{Ca}_{1-x}\text{La}_x\text{Ag}_y\text{Sb}$  (left) and ZrBeSi-type  $\text{SrAgSb}$  (right).

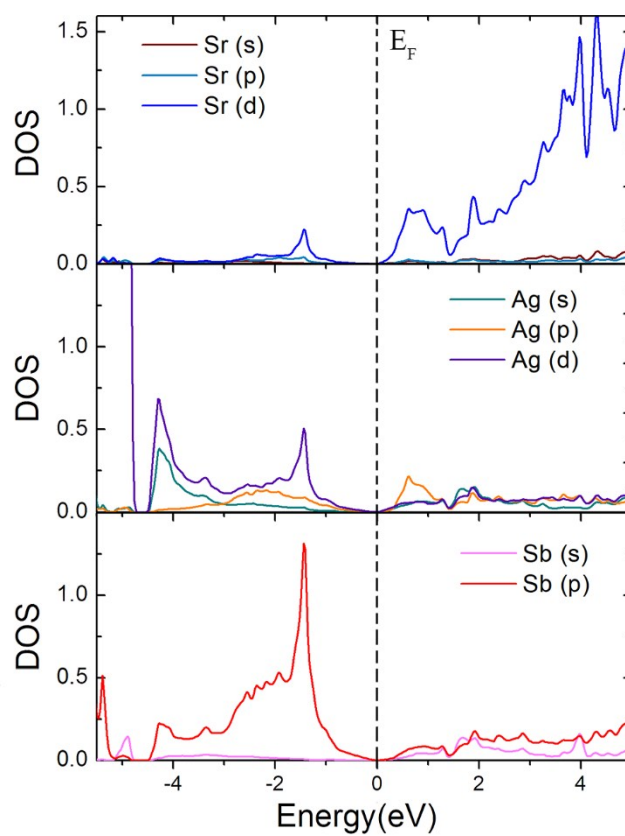

**Figure S8.** Partial density of states (DOS) for ZrBeSi-type SrAgSb.
